# Supplementary material for: Preventive Measures among Healthcare Workers (HCWs) during the COVID-19 Pandemic
Source: MDPI journal article supplement (doi:10.3390/ijerph20054434), 2023-03-02
Supplement: s1 [file s1]

# Study Questionnaire

Please complete the survey below.

Thank you!

Date: \_\_\_\_\_

Participant's Name: \_\_\_\_\_  
((Last Name, First Name))

Address (of residence) \_\_\_\_\_

Is the residence a:

- ☐ House
- ☐ Duplex home
- ☐ Apartment building
- ☐ Dorm

How many individuals live in the residence? \_\_\_\_\_

Telephone \_\_\_\_\_

Alternate telephone \_\_\_\_\_

E-mail \_\_\_\_\_

## Case Demographics

Date of Birth: \_\_\_\_\_

Age (in years): \_\_\_\_\_

Sex:

- ☐ Male
- ☐ Female
- ☐ Other
- ☐ Unknown

If female, currently pregnant

- ☐ Yes
- ☐ No
- ☐ Unknown

Ethnicity:

- ☐ Hispanic/Latino
- ☐ Non-Hispanic/Latino
- ☐ Unknown

Race (check all that apply):

- ☐ Black
- ☐ White
- ☐ Asian
- ☐ American Indian
- ☐ Native Hawaiian/Pacific Islander
- ☐ Unknown

Civil State:

- ☐ Single
- ☐ Married
- ☐ Separated
- ☐ Divorced
- ☐ Widow
- ☐ Cohabitation

Education:

- ☐ Currently enrolled at university
- ☐ Associate degree
- ☐ Bachelor's degree
- ☐ Graduate or professional degree
- ☐ Doctorate

### Healthcare Provider Information

Are you a healthcare provider in Puerto Rico?

- ☐ Yes
- ☐ No
- ☐ Unknown

If yes, what is your occupation?

- ☐ Physician
- ☐ Nurse
- ☐ Respiratory therapist
- ☐ Medical technologist
- ☐ Other

If other, specify

\_\_\_\_\_

If yes, what is your job setting?

- ☐ Hospital
- ☐ Long-term care facility
- ☐ Rehabilitation facility
- ☐ Clinical laboratory
- ☐ Nursing home/assisted living facility
- ☐ Other

If other, specify

\_\_\_\_\_

### Exposure Information

Are you currently sick?

Yes  
☐

No  
☐

**In the 14 days prior to illness onset, did you have any of the following exposures? (Check all that apply.)**

|                                                                                         | Yes                   | No                    |
|-----------------------------------------------------------------------------------------|-----------------------|-----------------------|
| Domestic travel (outside state of normal residence)                                     | <input type="radio"/> | <input type="radio"/> |
| Cruise ship or vessel travel as passenger or crew member.                               | <input type="radio"/> | <input type="radio"/> |
| Workplace                                                                               | <input type="radio"/> | <input type="radio"/> |
| Airport/airplane                                                                        | <input type="radio"/> | <input type="radio"/> |
| Adult congregate living facility (nursing, assisted living, or long-term care facility) | <input type="radio"/> | <input type="radio"/> |
| School/university/childcare center                                                      | <input type="radio"/> | <input type="radio"/> |
| Community events/mass gathering                                                         | <input type="radio"/> | <input type="radio"/> |
| International travel                                                                    | <input type="radio"/> | <input type="radio"/> |
| Contact with a known COVID-19 case (probable or confirmed)                              | <input type="radio"/> | <input type="radio"/> |
| Correctional facility                                                                   | <input type="radio"/> | <input type="radio"/> |
| Animal with confirmed or suspected COVID-19                                             | <input type="radio"/> | <input type="radio"/> |

Domestic travel:

If yes, specify state(s).

Cruise ship or travel as passenger or crew member.

If yes, specify name of ship:

International travel:

If yes, specify country(ies).

Workplace

If yes, is the workplace critical infrastructure (e.g., healthcare setting, grocery store)?

If you had contact with a known COVID-19 case:  
What type of contact?

- ☐ Household contact  
☐ Community-associated contact  
☐ Healthcare-associated contact

Animal with confirmed or suspected COVID-19:

If yes, specify animal.

Unknown exposures in the 14 days prior to illness onset:

Other exposures, specify:

## Use of Personal Protective Equipment

|                            | Yes                   | No                    |
|----------------------------|-----------------------|-----------------------|
| Gown                       | <input type="radio"/> | <input type="radio"/> |
| Gloves                     | <input type="radio"/> | <input type="radio"/> |
| Surgical mask              | <input type="radio"/> | <input type="radio"/> |
| N95 mask                   | <input type="radio"/> | <input type="radio"/> |
| Face shield                | <input type="radio"/> | <input type="radio"/> |
| Hand washing while at work | <input type="radio"/> | <input type="radio"/> |

Re-use gowns ☐ Yes  
☐ No

Re-use gloves ☐ Yes  
☐ No

Re-use surgical masks ☐ Yes  
☐ No

Re-use N95 mask ☐ Yes  
☐ No

Re-use Face shield ☐ Yes  
☐ No

Gown:

If yes, how many hours per day? \_\_\_\_\_

Gloves:

If yes, how many hours per day? \_\_\_\_\_

Surgical mask:

If yes, how many hours per day? \_\_\_\_\_

N95 mask:

If yes, how many hours per day? \_\_\_\_\_

Face Shield:

If yes, how many hours per day? \_\_\_\_\_

Hand washing while at work:

☐ 0-5  
☐ 6-10  
☐ >11

If yes, how many hours per day?

If the answer to any of the above questions is no,  
please explain why: \_\_\_\_\_

Exposure categories

- ☐ Are you a healthcare personnel who have had prolonged close contact with suspected/confirmed COVID-19 patients while NOT wearing personal protective equipment (PPE)
- ☐ Are you a healthcare personnel who had prolonged close contact with suspected/confirmed COVID-19 patients while wearing approved PPE
- ☐ Are you a healthcare personnel who had brief interactions with suspected/confirmed COVID-19 patients while wearing approved PPE

### Compliance with infection prevention and control measures

Did you receive training related to infection control and prevention?

- ☐ Yes
- ☐ No

If yes, when did you receive training? (MM/DD/YYYY)

\_\_\_\_\_

How many hours of training did you receive?

- ☐ Less than 2 hours
- ☐ More than 2 hours

Do you follow the hygiene guidelines as recommended?

- ☐ Yes, as recommended
- ☐ Most of the time
- ☐ Occasionally
- ☐ Rarely

Do you use alcohol-based hand sanitizer or soap and water before touching each patient?

- ☐ Yes, as recommended
- ☐ Most of the time
- ☐ Occasionally
- ☐ Rarely

Do you use alcohol-based hand sanitizer or soap and water after touching each patient, their fluids, or their surroundings?

- ☐ Yes, as recommended
- ☐ Most of the time
- ☐ Occasionally
- ☐ Rarely

Is there enough personal protective equipment in your workplace?

- ☐ Yes
- ☐ No
- ☐ Unknown

Handwashing while in the workplace

- ☐ Yes
- ☐ No

### Clinical Course, Symptoms, Past Medical History, and Social History

Have you experienced any symptoms in the past 2 weeks?

- ☐ Yes, symptomatic
- ☐ No symptoms

Onset date of symptoms (MM/DD/YYYY):

\_\_\_\_\_

If symptomatic, did your symptoms resolve?

- ☐ Yes
- ☐ No, still symptomatic
- ☐ Symptoms resolved, unknown date
- ☐ Unknown if symptoms resolved

If yes,

Date of symptom resolution (MM/DD/YYYY):

|                                                          | Yes                   | No                    | Unknown               | N/A                   |
|----------------------------------------------------------|-----------------------|-----------------------|-----------------------|-----------------------|
| Did you develop pneumonia?                               | <input type="radio"/> | <input type="radio"/> | <input type="radio"/> | <input type="radio"/> |
| Did you have acute respiratory distress syndrome?        | <input type="radio"/> | <input type="radio"/> | <input type="radio"/> | <input type="radio"/> |
| Did you have an abnormal chest X-ray?                    | <input type="radio"/> | <input type="radio"/> | <input type="radio"/> | <input type="radio"/> |
| Did you have another diagnosis/etiology for the illness? | <input type="radio"/> | <input type="radio"/> | <input type="radio"/> | <input type="radio"/> |
| Did you have an abnormal EKG?                            | <input type="radio"/> | <input type="radio"/> | <input type="radio"/> | <input type="radio"/> |
| Did you receive extracorporeal membrane oxygenation?     | <input type="radio"/> | <input type="radio"/> | <input type="radio"/> | <input type="radio"/> |
| Did you receive mechanical ventilation (MV)/intubation?  | <input type="radio"/> | <input type="radio"/> | <input type="radio"/> | <input type="radio"/> |

If yes,

Total days with MV:

**If symptomatic, which of the following did you experience during the illness?**

|                                                 | Yes                   | No                    | Unknown               |
|-------------------------------------------------|-----------------------|-----------------------|-----------------------|
| Fever >100.4F (38C)                             | <input type="radio"/> | <input type="radio"/> | <input type="radio"/> |
| Subjective fever (felt feverish)                | <input type="radio"/> | <input type="radio"/> | <input type="radio"/> |
| Chills                                          | <input type="radio"/> | <input type="radio"/> | <input type="radio"/> |
| Rigors                                          | <input type="radio"/> | <input type="radio"/> | <input type="radio"/> |
| Muscle aches (myalgia)                          | <input type="radio"/> | <input type="radio"/> | <input type="radio"/> |
| Runny nose (rhinorrhea)                         | <input type="radio"/> | <input type="radio"/> | <input type="radio"/> |
| Sore throat                                     | <input type="radio"/> | <input type="radio"/> | <input type="radio"/> |
| New olfactory and taste disorders               | <input type="radio"/> | <input type="radio"/> | <input type="radio"/> |
| Headache                                        | <input type="radio"/> | <input type="radio"/> | <input type="radio"/> |
| Fatigue                                         | <input type="radio"/> | <input type="radio"/> | <input type="radio"/> |
| Joint pain                                      | <input type="radio"/> | <input type="radio"/> | <input type="radio"/> |
| Nasal bleeding                                  | <input type="radio"/> | <input type="radio"/> | <input type="radio"/> |
| Conjunctivitis                                  | <input type="radio"/> | <input type="radio"/> | <input type="radio"/> |
| Cough (new onset or worsening of chronic cough) | <input type="radio"/> | <input type="radio"/> | <input type="radio"/> |
| Difficulty breathing                            | <input type="radio"/> | <input type="radio"/> | <input type="radio"/> |
| Chest pain                                      | <input type="radio"/> | <input type="radio"/> | <input type="radio"/> |

|                                        |                       |                       |                       |
|----------------------------------------|-----------------------|-----------------------|-----------------------|
| Nausea or vomiting                     | <input type="radio"/> | <input type="radio"/> | <input type="radio"/> |
| Abdominal pain                         | <input type="radio"/> | <input type="radio"/> | <input type="radio"/> |
| Diarrhea (>3 loose stools/24hr period) | <input type="radio"/> | <input type="radio"/> | <input type="radio"/> |
| Rash                                   | <input type="radio"/> | <input type="radio"/> | <input type="radio"/> |
| Were you hospitalized?                 | <input type="radio"/> | <input type="radio"/> | <input type="radio"/> |

Other symptoms? Specify:

---

If hospitalized:

Date of hospitalization (MM, DD, YYYY)

---

If hospitalized,

Specify the reason:

---

**Do you have any of the following underlying medical condition and/or risk behaviors?**

|                                                                 | Yes                   | No                    | Unknown               |
|-----------------------------------------------------------------|-----------------------|-----------------------|-----------------------|
| Diabetes                                                        | <input type="radio"/> | <input type="radio"/> | <input type="radio"/> |
| Hypertension                                                    | <input type="radio"/> | <input type="radio"/> | <input type="radio"/> |
| Severe obesity (BMI >40)                                        | <input type="radio"/> | <input type="radio"/> | <input type="radio"/> |
| Cardiovascular disease                                          | <input type="radio"/> | <input type="radio"/> | <input type="radio"/> |
| Chronic Renal disease                                           | <input type="radio"/> | <input type="radio"/> | <input type="radio"/> |
| Chronic Liver disease                                           | <input type="radio"/> | <input type="radio"/> | <input type="radio"/> |
| Arthritis                                                       | <input type="radio"/> | <input type="radio"/> | <input type="radio"/> |
| Chronic Lung disease (asthma/emphysema/COPD)                    | <input type="radio"/> | <input type="radio"/> | <input type="radio"/> |
| Immunosuppressive condition                                     | <input type="radio"/> | <input type="radio"/> | <input type="radio"/> |
| Autoimmune condition                                            | <input type="radio"/> | <input type="radio"/> | <input type="radio"/> |
| Current smoker                                                  | <input type="radio"/> | <input type="radio"/> | <input type="radio"/> |
| Former smoker                                                   | <input type="radio"/> | <input type="radio"/> | <input type="radio"/> |
| Second-hand smoker                                              | <input type="radio"/> | <input type="radio"/> | <input type="radio"/> |
| Alcohol                                                         | <input type="radio"/> | <input type="radio"/> | <input type="radio"/> |
| Substance abuse or misuse                                       | <input type="radio"/> | <input type="radio"/> | <input type="radio"/> |
| Disability (neurologic, physical, vision or hearing impairment) | <input type="radio"/> | <input type="radio"/> | <input type="radio"/> |
| Psychological/psychiatric condition                             | <input type="radio"/> | <input type="radio"/> | <input type="radio"/> |
| Other chronic diseases                                          | <input type="radio"/> | <input type="radio"/> | <input type="radio"/> |
| Other underlying condition or risk behavior                     | <input type="radio"/> | <input type="radio"/> | <input type="radio"/> |

Diabetes:

---

If yes, specify type:

Disability:

If yes, specify:

Other Chronic disease:

If yes, which other chronic disease?

Other Underlying condition or risk behavior

If yes, specify:

### Sample Collection

Choose a day for sample collection:  
(Please choose a day Monday-Tuesday or  
Thursday-Friday)

Choose a time:

- ☐ 8:00am-12:00pm  
☐ 1:00pm-2:30pm

### COVID-19 Vaccination

|                                                               | Yes                   | No |
|---------------------------------------------------------------|-----------------------|----|
| Are you vaccinated against<br><input type="radio"/> COVID-19? | <input type="radio"/> |    |

Which vaccine did you receive?

- ☐ Pfizer  
☐ Moderna  
☐ Johnson and Johnson

Date of First Dose

Date of Second Dose
